# Supplementary material for: A Diabetes Education App for People Living With Type 2 Diabetes: Co-Design Study
Source: PubMed Central journal article supplement (PMC10546275; doi:10.2196/45490), 2023-09-18
Supplement: formative_v7i1e45490_app1.pdf [file formative_v7i1e45490_app1.pdf]

## Appendix 1: Screenshots of the app Mock-ups of the app prototype

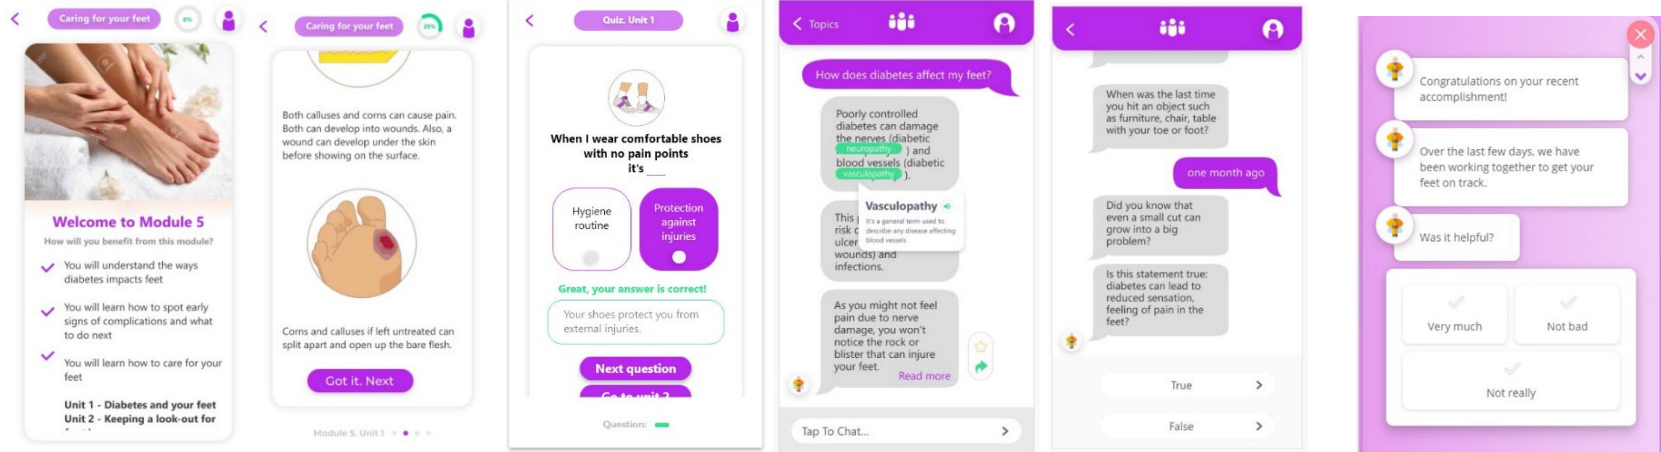

Conversations in Adobe XD prototype

Quriobot conversation prototype
