# Supplementary material for: A Diabetes Education App for People Living With Type 2 Diabetes: Co-Design Study
Source: PubMed Central journal article supplement (PMC10546275; doi:10.2196/45490), 2023-09-18
Supplement: formative_v7i1e45490_app2.pdf [file formative_v7i1e45490_app2.pdf]

## Appendix 2: COREQ 32-item checklist

| Item                                          | Guide questions/description                                           | Reported on the page (#) |
|-----------------------------------------------|-----------------------------------------------------------------------|--------------------------|
| Domain 1: Research team and reflexivity       |                                                                       |                          |
| 1. Interviewer/facilitator                    | Which author/s conducted the interview?                               | Yes<br>(methods)         |
| 2. Credentials                                | What were the researchers' credentials?                               | Yes<br>(methods)         |
| 3. Occupation                                 | What was their occupation at the time of the study?                   | Yes<br>(methods)         |
| 4. Gender                                     | Was the researcher male or female?                                    | Yes<br>(methods)         |
| 5. Experience and training                    | What experience or training did the researcher have?                  | Yes<br>(methods)         |
| 6. Relationship with participants established | Was a relationship established prior to study commencement?           | Yes<br>(methods)         |
| 7. Participant knowledge of the interviewer   | What did the participants know about the researcher?                  | Yes<br>(methods)         |
| 8. Interviewer characteristics                | What characteristics were reported about the interviewer/facilitator? |                          |
| Domain 2: Study Design                        |                                                                       |                          |
| 9. Methodological orientation and theory      | What methodology orientation was started to underpin the study?       | Yes<br>(methods)         |
| 10. Sampling                                  | How were participants selected?                                       |                          |
| 11. Method of approach                        | How were participants approached?                                     | Yes<br>(methods)         |
| 12. Sample size                               | How many participants were in the study?                              | Yes<br>(methods)         |
| 13. Non-participation                         | How many people refused to participate or dropped out? Reasons?       |                          |

|                                    |                                                                                                         |                      |
|------------------------------------|---------------------------------------------------------------------------------------------------------|----------------------|
| 14. Setting of data collection     | Where was the data collected?                                                                           | Yes<br>(methods)     |
| 15. Presence of non-participants   | Was anyone else present besides the participants and researchers?                                       |                      |
| 16. Description of sample          | What are the important characteristics of the sample?                                                   | Yes<br>(methods)     |
| 17. Interview guide                | Were questions, prompts, guides provided by the authors?                                                | Yes<br>(appendix 3). |
| 18. Repeat interviews              | Were repeat interviews carried out?                                                                     | No                   |
| 19. Audio/visual recording         | Did the research use audio or visual recording to collect the data?                                     | Yes<br>(methods)     |
| 20. Field notes                    | Were field notes made during and/or after the interview?                                                | Yes<br>(methods)     |
| 21. Duration                       | What was the duration of the interviews?                                                                | Yes<br>(methods)     |
| 22. Data saturation                | Was data saturation discussed?                                                                          | Yes<br>(methods)     |
| 23. Transcripts returned           | Were transcripts returned to participants for comment and/or correction?                                | No                   |
| Domain 3: analysis and findings    |                                                                                                         |                      |
| 24. Number of data coders          | How many data coders coded the data?                                                                    | Yes<br>(methods)     |
| 25. Description of the coding tree | Did authors provide a description of the coding tree?                                                   | Yes<br>(appendix 4)  |
| 26. Derivation of themes           | Were themes identified in advance or derived from the data?                                             | Yes<br>(methods)     |
| 27. Software                       | What software, if applicable, was used to manage the data?                                              | Yes<br>(methods)     |
| 28. Participant checking           | Did participants provide feedback on the findings?                                                      |                      |
| 29. Quotations presented           | Were participant quotations presented to illustrate the themes/findings? Was each quotation identified? | Yes<br>(results)     |

|                                  |                                                                        |                  |
|----------------------------------|------------------------------------------------------------------------|------------------|
| 30. Data and findings consistent | Was there consistency between the data presented and the findings?     | Yes<br>(results) |
| 31. Clarity of major themes      | Were major themes clearly presented in the findings?                   | Yes<br>(results) |
| 32. Clarity of minor themes      | Is there a description of diverse cases or discussion of minor themes? | Yes<br>(results) |
